# Supplementary material for: Chloroplast genomes of Byrsonima species (Malpighiaceae): comparative analysis and screening of high divergence sequences
Source: PubMed Central journal article supplement (PMC5797077; doi:10.1038/s41598-018-20189-4), 2018-02-02
Supplement: 41598_2018_20189_MOESM1_ESM.pdf [file 41598_2018_20189_MOESM1_ESM.pdf]

## Supplementary information

### **Title: Chloroplast genomes of *Byrsonima* species (Malpighiaceae): comparative analysis and screening of high divergence sequences**

**Alison P. A. Menezes<sup>1,\*</sup>, Luciana C. Resende-Moreira<sup>1,\*</sup>, Renata S. O. Buzatti<sup>1,\*</sup>,  
Alison G. Nazareno<sup>2</sup>, Monica Carlsen<sup>3,4</sup>, Francisco P. Lobo<sup>1</sup>, Evanguedes  
Kalapothakis<sup>1</sup> & Maria Bernadete Lovato<sup>1</sup>**

<sup>1</sup>Departamento de Biologia Geral, Universidade Federal de Minas Gerais, CP 486, Belo Horizonte, MG 31270-901, Brazil

<sup>2</sup>Universidade de São Paulo, Instituto de Biociências, Departamento de Botânica, São Paulo, São Paulo, Brazil

<sup>3</sup>Smithsonian Institution, Botany Department, National Museum of Natural History, Washington, D.C., United States of America

<sup>4</sup>Current address: Science and Conservation Division, Missouri Botanical Garden, St. Louis, Missouri, United States of America

\*These authors contributed equally to this work.

Correspondence should be addressed to M.B.L. (email: lovatomb@icb.ufmg.br).

Supplementary figures

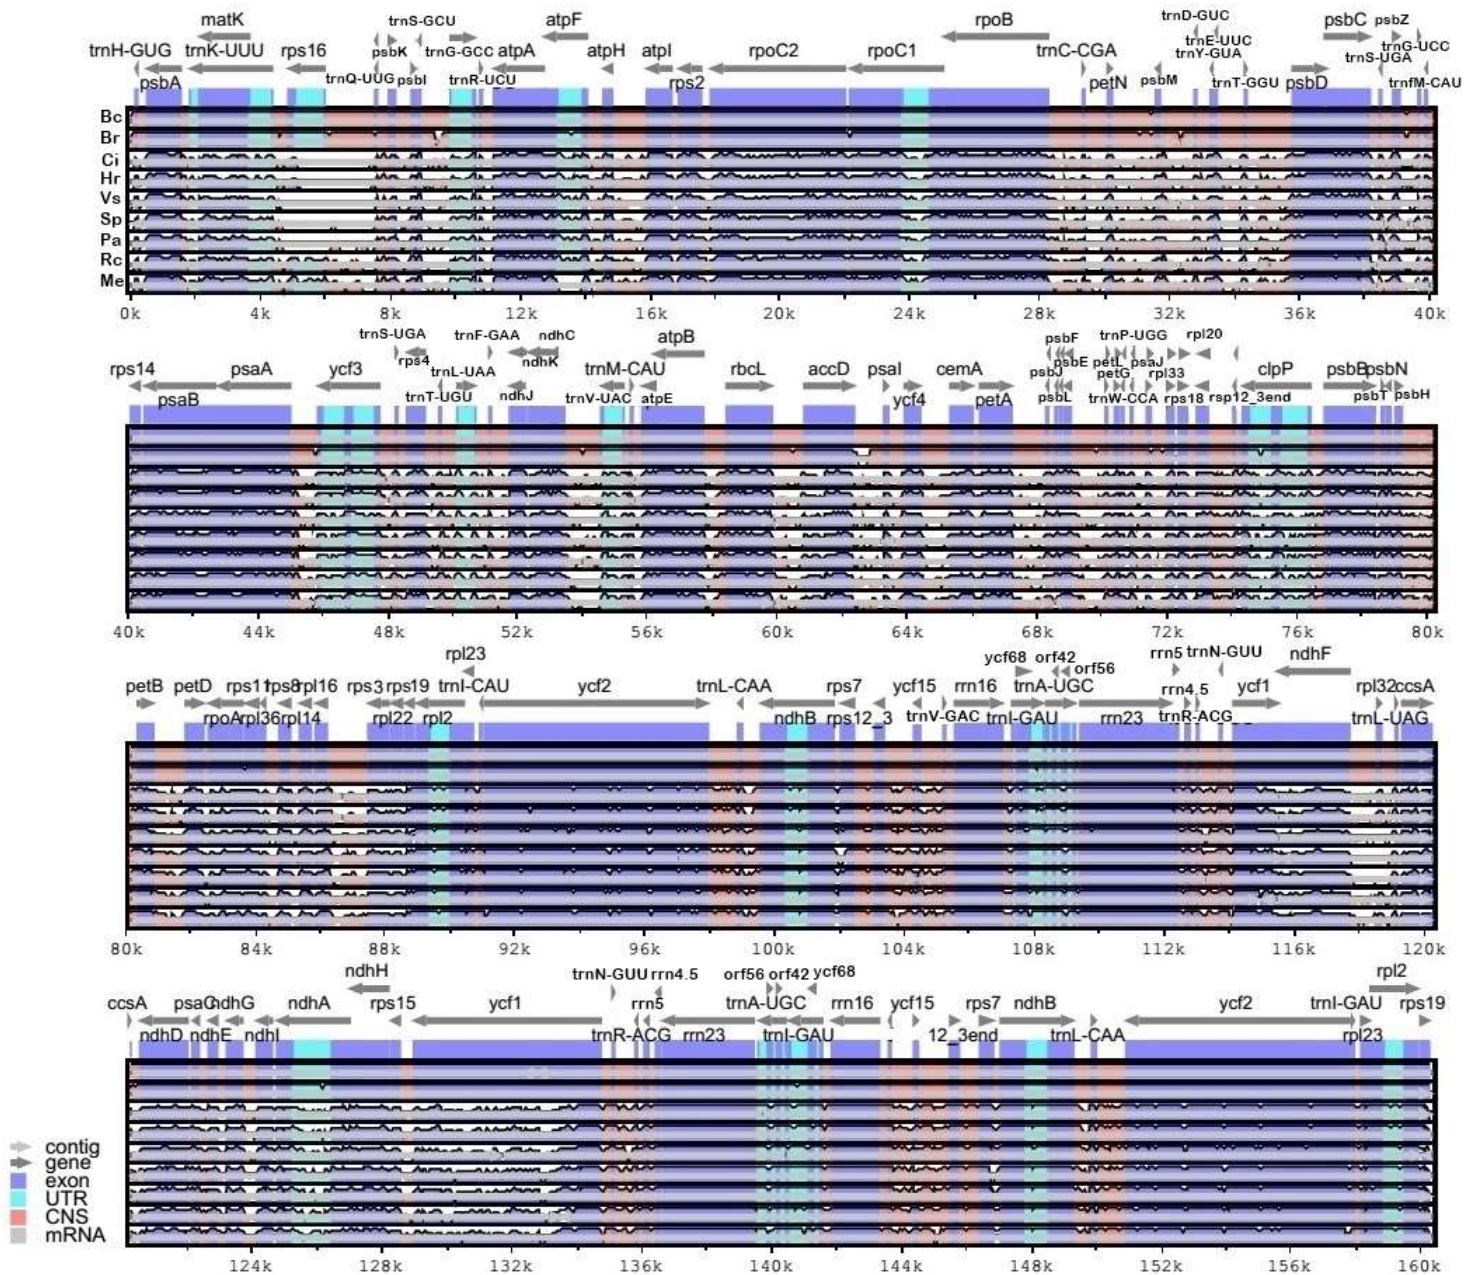

**Figure S1 - Comparisons of percentage identity of chloroplast genomes for nine species belonging to five different families within Malpighiales order. Bc:** *Byrsonima coccolobifolia* and Br: *B. crassifolia* (Malpighiaceae); Ci: *Chrysobalanus icaco* and Hr: *Hirtela racemosa* (Chrysobalanaceae); Vs: *Viola seoulensis* (Violaceae); Sp: *Salix purpurea* and Pa: *Populus alba* (Salicaceae); Rc: *Ricinus communis* and Me: *Manihot esculenta* (Euphorbiaceae). The percentage of identity is shown in the vertical axis, ranging from 50% to 100%, while the horizontal axis shows the position within the chloroplast genome. Each arrow displays the annotated genes and direction of their transcription in the reference genome (*Byrsonima coccolobifolia*). Genome regions are

color coded as exon, untranslated region (UTR), conserved noncoding sequences (CNS) and mRNA.

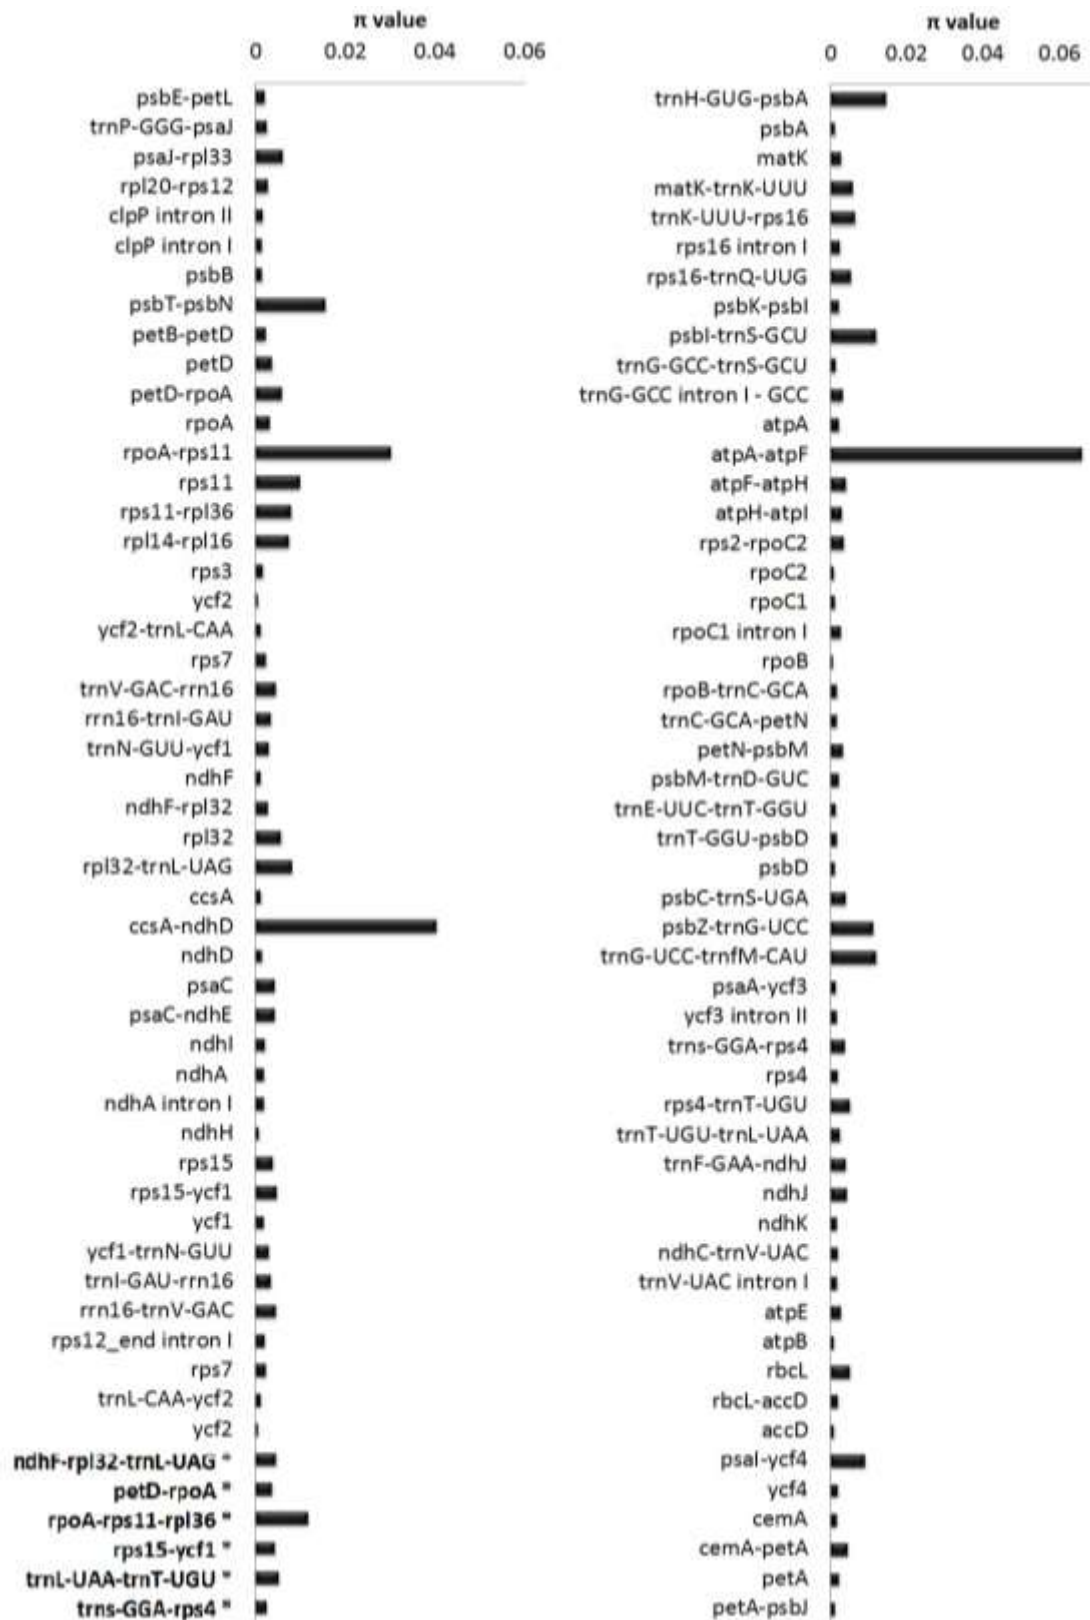

**Figure S2 - Nucleotide divergence ( $\pi$ ) between *Byrsonima coccolobifolia* and *B. crassifolia*. Sequences with  $\pi$  equal to 0 were excluded; \* regions in bold present the  $\pi$  value for regions with more than one sequence in a row presenting high  $\pi$  values.**

Supplementary Tables

**Table S1.** Codon usage for *Byrsonima coccolobifolia* and *B. crassifolia*

| Codon | Amino acid | Number of codons         |                       | Codon | Amino acid | Number of codons         |                       |
|-------|------------|--------------------------|-----------------------|-------|------------|--------------------------|-----------------------|
|       |            | <i>B. coccolobifolia</i> | <i>B. crassifolia</i> |       |            | <i>B. coccolobifolia</i> | <i>B. crassifolia</i> |
| GCA   | A          | 413                      | 414                   | CCA   | P          | 310                      | 312                   |
| GCC   | A          | 241                      | 239                   | CCC   | P          | 217                      | 219                   |
| GCG   | A          | 153                      | 155                   | CCG   | P          | 157                      | 156                   |
| GCT   | A          | 667                      | 667                   | CCT   | P          | 450                      | 450                   |
| GC    | C          | 106                      | 106                   | CAA   | Q          | 775                      | 772                   |
| TGT   | C          | 236                      | 237                   | CAG   | Q          | 230                      | 233                   |
| GAC   | D          | 245                      | 246                   | AGA   | R          | 531                      | 531                   |
| GAT   | D          | 904                      | 905                   | AGG   | R          | 192                      | 193                   |
| GAA   | E          | 1126                     | 1121                  | CGA   | R          | 378                      | 379                   |
| GAG   | E          | 387                      | 386                   | CGC   | R          | 114                      | 114                   |
| TTC   | F          | 583                      | 579                   | CGG   | R          | 122                      | 123                   |
| TTT   | F          | 1127                     | 1126                  | CGT   | R          | 351                      | 350                   |
| GGA   | G          | 772                      | 771                   | AGC   | S          | 156                      | 155                   |
| GGC   | G          | 194                      | 193                   | AGT   | S          | 437                      | 436                   |
| GGG   | G          | 332                      | 334                   | TCA   | S          | 444                      | 445                   |
| GGT   | G          | 630                      | 628                   | TCC   | S          | 381                      | 383                   |
| CAC   | H          | 170                      | 169                   | TCG   | S          | 203                      | 204                   |
| CAT   | H          | 556                      | 555                   | TCT   | S          | 641                      | 638                   |
| ATA   | I          | 785                      | 784                   | ACA   | T          | 438                      | 441                   |
| ATC   | I          | 468                      | 466                   | ACC   | T          | 279                      | 277                   |
| ATT   | I          | 1210                     | 1213                  | ACG   | T          | 157                      | 158                   |
| AAA   | K          | 1145                     | 1145                  | ACT   | T          | 566                      | 566                   |
| AAG   | K          | 385                      | 385                   | GTA   | V          | 557                      | 559                   |
| CTA   | L          | 432                      | 432                   | GTC   | V          | 189                      | 191                   |
| CTC   | L          | 210                      | 213                   | GTG   | V          | 231                      | 225                   |
| CTG   | L          | 199                      | 200                   | GTT   | V          | 534                      | 535                   |
| CTT   | L          | 641                      | 639                   | TGG   | W          | 538                      | 537                   |
| TTA   | L          | 949                      | 946                   | TAC   | Y          | 194                      | 193                   |
| TTG   | L          | 595                      | 596                   | TAT   | Y          | 854                      | 855                   |
| ATG   | M          | 654                      | 654                   | TAA   | *          | 64                       | 63                    |
| AAC   | N          | 329                      | 327                   | TAG   | *          | 37                       | 37                    |
| AAT   | N          | 1102                     | 1105                  | TGA   | *          | 29                       | 29                    |

**Table S2.** Evolutionary rates of eighty six gene sequences between the chloroplast genomes of nine species of the order Malpighiales (for species abbreviation see Supplementary Table S1).

| Genes        | Species | Sequence length | Ka     | Ks     | Ka/Ks  |
|--------------|---------|-----------------|--------|--------|--------|
| <b>psbA</b>  | Bc      | 1059            | 0.0067 | 0.2234 | 0.0302 |
|              | Br      | 1059            | 0.0067 | 0.2329 | 0.0289 |
|              | Ci      | 1059            | 0.0061 | 0.2542 | 0.0239 |
|              | Hr      | 1059            | 0.0062 | 0.2483 | 0.0251 |
|              | Vs      | 1059            | 0.0070 | 0.2568 | 0.0273 |
|              | Pa      | 1059            | 0.0039 | 0.2652 | 0.0147 |
|              | Sp      | 1059            | 0.0064 | 0.2544 | 0.0251 |
|              | Me      | 1059            | 0.0020 | 0.1724 | 0.0117 |
|              | Rc      | 1059            | 0.0022 | 0.2040 | 0.0107 |
| <b>matK</b>  | Bc      | 1509            | 0.1610 | 0.3463 | 0.4649 |
|              | Br      | 1503            | 0.1564 | 0.3363 | 0.4649 |
|              | Ci      | 1191            | 0.1698 | 0.4740 | 0.3583 |
|              | Hr      | 729             | 0.1516 | 0.4564 | 0.3322 |
|              | Vs      | 1356            | 0.1839 | 0.4611 | 0.3988 |
|              | Pa      | 1506            | 0.1554 | 0.3339 | 0.4654 |
|              | Sp      | 1500            | 0.1469 | 0.3542 | 0.4148 |
|              | Me      | 1386            | 0.1732 | 0.1103 | 1.5700 |
|              | Rc      | 1509            | 0.1431 | 0.3398 | 0.4213 |
| <b>rps16</b> | Bc      | 213             | 0.0736 | 0.3719 | 0.1979 |
|              | Br      | 216             | 0.0972 | 0.3560 | 0.2731 |
|              | Ci      | 204             | 0.1921 | 0.3620 | 0.5306 |
|              | Hr      | 204             | 0.1700 | 0.3715 | 0.4574 |
|              | Vs      | -               | -      | -      | -      |
|              | Pa      | -               | -      | -      | -      |
|              | Sp      | -               | -      | -      | -      |
|              | Me      | 216             | 0.0607 | 0.2167 | 0.2802 |

|             |    |      |        |        |        |
|-------------|----|------|--------|--------|--------|
|             | Rc | 216  | 0.0657 | 0.2748 | 0.2390 |
| <b>psbK</b> | Bc | 183  | 0.0301 | 0.4229 | 0.0713 |
|             | Br | 183  | 0.0302 | 0.4229 | 0.0713 |
|             | Ci | 183  | 0.0475 | 0.4188 | 0.1134 |
|             | Hr | 183  | 0.0446 | 0.4150 | 0.1076 |
|             | Vs | 171  | 0.0301 | 0      | 0.0629 |
|             | Pa | 183  | 0.0314 | 0.4361 | 0.0721 |
|             | Sp | 183  | 0.0273 | 0.4301 | 0.0636 |
|             | Me | 183  | 0.0480 | 0.6296 | 0.0763 |
|             | Rc | 183  | 0.0333 | 0.8613 | 0.0387 |
| <b>psbI</b> | Bc | 108  | 0.0479 | 0.6417 | 0.0746 |
|             | Br | 108  | 0.0479 | 0.6417 | 0.0746 |
|             | Ci | 123  | 0.0092 | 0.3329 | 0.0276 |
|             | Hr | 120  | 0.0003 | 0.3629 | 0.0009 |
|             | Vs | 129  | 0.0257 | 0.3667 | 0.0700 |
|             | Pa | 108  | 0.0005 | 0.4988 | 0.0010 |
|             | Sp | 135  | 0.0233 | 0.3914 | 0.0595 |
|             | Me | 153  | 0.0854 | 0.1680 | 0.5086 |
|             | Rc | 132  | 0.0312 | 0.2484 | 0.1258 |
| <b>atpA</b> | Bc | 1515 | 0.0368 | 0.3044 | 0.1211 |
|             | Br | 1515 | 0.0370 | 0.3026 | 0.1222 |
|             | Ci | 1518 | 0.0457 | 0.3450 | 0.1324 |
|             | Hr | 1518 | 0.0483 | 0.3498 | 0.1381 |
|             | Vs | 1515 | 0.0582 | 0.4227 | 0.1377 |
|             | Pa | 1518 | 0.0567 | 0.3217 | 0.1764 |
|             | Sp | 1518 | 0.0672 | 0.3397 | 0.1979 |
|             | Me | 1518 | 0.0378 | 0.2862 | 0.1322 |
|             | Rc | 1518 | 0.0349 | 0.3109 | 0.1123 |
| <b>atpF</b> | Bc | 552  | 0.0842 | 0.5309 | 0.1586 |

|             |    |     |        |        |        |
|-------------|----|-----|--------|--------|--------|
|             | Br | 552 | 0.0842 | 0.5309 | 0.1586 |
|             | Ci | 549 | 0.1069 | 0.6690 | 0.1598 |
|             | Hr | 564 | 0.0938 | 0.6617 | 0.1418 |
|             | Vs | 564 | 0.0784 | 0.5975 | 0.1312 |
|             | Pa | 627 | 0.0513 | 0.4640 | 0.1106 |
|             | Sp | 561 | 0.0487 | 0.5145 | 0.0947 |
|             | Me | 552 | 0.0827 | 0.4819 | 0.1715 |
|             | Rc | 612 | 0.0818 | 0.4845 | 0.1689 |
| <b>atpH</b> | Bc | 243 | 0.0001 | 0.1645 | 0.0010 |
|             | Br | 243 | 0.0002 | 0.1646 | 0.0010 |
|             | Ci | 243 | 0.0003 | 0.2306 | 0.0014 |
|             | Hr | 243 | 0.0003 | 0.2306 | 0.0014 |
|             | Vs | 243 | 0.0035 | 0.1862 | 0.0188 |
|             | Pa | 243 | 0.0002 | 0.1254 | 0.0016 |
|             | Sp | 243 | 0.0002 | 0.1412 | 0.0014 |
|             | Me | 243 | 0.0003 | 0.2051 | 0.0013 |
|             | Rc | 243 | 0.0002 | 0.1499 | 0.0013 |
| <b>atpI</b> | Bc | 741 | 0.0206 | 0.2457 | 0.0840 |
|             | Br | 741 | 0.0206 | 0.2457 | 0.0840 |
|             | Ci | 741 | 0.0203 | 0.6437 | 0.0315 |
|             | Hr | 741 | 0.0187 | 0.6359 | 0.0294 |
|             | Vs | 741 | 0.0251 | 0.5657 | 0.0444 |
|             | Pa | 741 | 0.0268 | 0.4266 | 0.0629 |
|             | Sp | 741 | 0.0258 | 0.4142 | 0.0624 |
|             | Me | 741 | 0.0173 | 0.4664 | 0.0371 |
|             | Rc | 741 | 0.0172 | 0.4806 | 0.0358 |
| <b>rps2</b> | Bc | 705 | 0.0472 | 0.2965 | 0.1591 |
|             | Br | 705 | 0.0472 | 0.2965 | 0.1591 |
|             | Ci | 708 | 0.0528 | 0.3456 | 0.1529 |



|              |    |      |        |        |        |
|--------------|----|------|--------|--------|--------|
|              | Hr | 708  | 0.0502 | 0.3542 | 0.1418 |
|              | Vs | 705  | 0.0687 | 0.3736 | 0.1839 |
|              | Pa | 708  | 0.0642 | 0.2718 | 0.2363 |
|              | Sp | 708  | 0.0615 | 0.2707 | 0.2272 |
|              | Me | 708  | 0.0458 | 0.2534 | 0.1806 |
|              | Rc | 708  | 0.0392 | 0.2810 | 0.1395 |
| <b>rpoC2</b> | Bc | 4143 | 0.0919 | 0.2828 | 0.3251 |
|              | Br | 4143 | 0.0917 | 0.2806 | 0.3269 |
|              | Ci | 4152 | 0.0978 | 0.2857 | 0.3425 |
|              | Hr | 4140 | 0.0724 | 0.2801 | 0.2584 |
|              | Vs | 3759 | 0.0936 | 0.3434 | 0.2725 |
|              | Pa | 4137 | 0.0868 | 0.2836 | 0.3061 |
|              | Sp | 4104 | 0.0870 | 0.3058 | 0.2846 |
|              | Me | 4089 | 0.0724 | 0.2801 | 0.2584 |
|              | Rc | 4143 | 0.0799 | 0.2705 | 0.2955 |
| <b>rpoC1</b> | Bc | 2052 | 0.0444 | 0.2811 | 0.1582 |
|              | Br | 2037 | 0.0457 | 0.2751 | 0.1664 |
|              | Ci | 2049 | 0.0380 | 0.2561 | 0.1483 |
|              | Hr | 2049 | 0.0383 | 0.2618 | 0.1463 |
|              | Vs | 2046 | 0.0491 | 0.2815 | 0.1743 |
|              | Pa | 2052 | 0.0407 | 0.2551 | 0.1597 |
|              | Sp | 2061 | 0.0406 | 0.2666 | 0.1524 |
|              | Me | 2052 | 0.0319 | 0.2354 | 0.1353 |
|              | Rc | 2052 | 0.0342 | 0.2390 | 0.1430 |
| <b>rpoB</b>  | Bc | 3210 | 0.0378 | 0.2757 | 0.1370 |
|              | Br | 3210 | 0.0377 | 0.2737 | 0.1378 |
|              | Ci | 3210 | 0.0448 | 0.2924 | 0.1532 |
|              | Hr | 3210 | 0.0440 | 0.3062 | 0.1437 |
|              | Vs | 3207 | 0.0483 | 0.3056 | 0.1582 |

|             |    |      |        |        |        |
|-------------|----|------|--------|--------|--------|
|             | Pa | 3207 | 0.0426 | 0.2595 | 0.1643 |
|             | Sp | 3207 | 0.0434 | 0.2623 | 0.1656 |
|             | Me | 3210 | 0.0352 | 0.2380 | 0.1480 |
|             | Rc | 3210 | 0.0341 | 0.2501 | 0.1363 |
| <b>petN</b> | Bc | 93   | 0.0307 | 0.0905 | 0.3397 |
|             | Br | 93   | 0.0307 | 0.0905 | 0.3397 |
|             | Ci | 93   | 0.0006 | 0.1391 | 0.0042 |
|             | Hr | 93   | 0.0006 | 0.1391 | 0.0042 |
|             | Vs | 93   | 0.0004 | 0.0917 | 0.0043 |
|             | Pa | 93   | 0.0006 | 0.1123 | 0.0052 |
|             | Sp | 93   | 0.0006 | 0.1123 | 0.0052 |
|             | Me | 93   | 0.0004 | 0.0798 | 0.0049 |
|             | Rc | 93   | 0.0008 | 0.1746 | 0.0045 |
| <b>psbM</b> | Bc | 102  | 0.0114 | 0.3785 | 0.0302 |
|             | Br | 102  | 0.0114 | 0.3785 | 0.0302 |
|             | Ci | 102  | 0.0486 | 0.3034 | 0.1603 |
|             | Hr | 102  | 0.0095 | 0.3458 | 0.0274 |
|             | Vs | 102  | 0.0319 | 0.2392 | 0.1334 |
|             | Pa | 102  | 0.0086 | 0.5573 | 0.0155 |
|             | Sp | 102  | 0.0086 | 0.5573 | 0.0155 |
|             | Me | 102  | 0.0193 | 0.2635 | 0.0730 |
|             | Rc | 102  | 0.0109 | 0.3558 | 0.0306 |
| <b>psbD</b> | Bc | 1059 | 0.0025 | 0.2513 | 0.0102 |
|             | Br | 1059 | 0.0038 | 0.2532 | 0.0152 |
|             | Ci | 1059 | 0.0114 | 0.3742 | 0.0304 |
|             | Hr | 1059 | 0.0114 | 0.3597 | 0.0317 |
|             | Vs | 1059 | 0.0070 | 0.3814 | 0.0184 |
|             | Pa | 1059 | 0.0076 | 0.3028 | 0.0251 |
|             | Sp | 1059 | 0.0038 | 0.3284 | 0.0116 |

|              |    |      |        |        |        |
|--------------|----|------|--------|--------|--------|
|              | Me | 1059 | 0.0006 | 0.2310 | 0.0025 |
|              | Rc | 1059 | 0.0006 | 0.2255 | 0.0026 |
| <b>psbC</b>  | Bc | 1458 | 0.0068 | 0.2040 | 0.0333 |
|              | Br | 1458 | 0.0068 | 0.2040 | 0.0333 |
|              | Ci | 1458 | 0.0091 | 0.2438 | 0.0372 |
|              | Hr | 1458 | 0.0091 | 0.2360 | 0.0384 |
|              | Vs | 1458 | 0.0094 | 0.2611 | 0.0362 |
|              | Pa | 1458 | 0.0080 | 0.1997 | 0.0400 |
|              | Sp | 1458 | 0.0091 | 0.2149 | 0.0422 |
|              | Me | 1458 | 0.0058 | 0.1901 | 0.0306 |
|              | Rc | 1458 | 0.0057 | 0.2026 | 0.0281 |
| <b>psbZ</b>  | Bc | 186  | 0.0299 | 0.7953 | 0.0376 |
|              | Br | 186  | 0.0299 | 0.7953 | 0.0376 |
|              | Ci | 186  | 0.0392 | 0.5982 | 0.0656 |
|              | Hr | 186  | 0.0307 | 0.6084 | 0.0505 |
|              | Vs | 186  | 0.0222 | 0.9505 | 0.0234 |
|              | Pa | 186  | 0.0229 | 0.7278 | 0.0315 |
|              | Sp | 186  | 0.0233 | 0.9463 | 0.0246 |
|              | Me | 186  | 0.0226 | 0.5465 | 0.0413 |
|              | Rc | 186  | 0.0310 | 0.6639 | 0.0466 |
| <b>rps14</b> | Bc | 300  | 0.0713 | 0.1124 | 0.6343 |
|              | Br | 300  | 0.0713 | 0.1124 | 0.6343 |
|              | Ci | 300  | 0.0573 | 0.1103 | 0.5196 |
|              | Hr | 300  | 0.0580 | 0.1194 | 0.4855 |
|              | Vs | 300  | 0.0646 | 0.2125 | 0.3037 |
|              | Pa | 300  | 0.0336 | 0.1459 | 0.2305 |
|              | Sp | 300  | 0.0330 | 0.1826 | 0.1804 |
|              | Me | 300  | 0.0336 | 0.1270 | 0.2648 |
|              | Rc | 300  | 0.0264 | 0.1429 | 0.1845 |

|             |    |      |        |        |        |
|-------------|----|------|--------|--------|--------|
| <b>psaB</b> | Bc | 2202 | 0.0134 | 0.3832 | 0.0350 |
|             | Br | 2202 | 0.0134 | 0.3832 | 0.0350 |
|             | Ci | 2202 | 0.0111 | 0.3344 | 0.0332 |
|             | Hr | 2202 | 0.0123 | 0.3260 | 0.0378 |
|             | Vs | 2202 | 0.0138 | 0.3803 | 0.0362 |
|             | Pa | 2202 | 0.0112 | 0.2818 | 0.0398 |
|             | Sp | 2202 | 0.0111 | 0.3265 | 0.0340 |
|             | Me | 2202 | 0.0122 | 0.3186 | 0.0383 |
|             | Rc | 2202 | 0.0120 | 0.3243 | 0.0370 |
| <b>psaA</b> | Bc | 2250 | 0.0085 | 0.3157 | 0.0269 |
|             | Br | 2250 | 0.0085 | 0.3157 | 0.0269 |
|             | Ci | 2250 | 0.0077 | 0.3042 | 0.0254 |
|             | Hr | 2250 | 0.0086 | 0.3021 | 0.0285 |
|             | Vs | 2250 | 0.0115 | 0.3075 | 0.0375 |
|             | Pa | 2250 | 0.0101 | 0.2759 | 0.0365 |
|             | Sp | 2250 | 0.0102 | 0.2738 | 0.0373 |
|             | Me | 2250 | 0.0060 | 0.2545 | 0.0235 |
|             | Rc | 2250 | 0.0096 | 0.2818 | 0.0342 |
| <b>ycf3</b> | Bc | 501  | 0.0180 | 0.2372 | 0.0761 |
|             | Br | 504  | 0.0179 | 0.2366 | 0.0758 |
|             | Ci | 504  | 0.0147 | 0.3406 | 0.0433 |
|             | Hr | 504  | 0.0178 | 0.3290 | 0.0542 |
|             | Vs | 375  | 0.0081 | 0.4931 | 0.0165 |
|             | Pa | 504  | 0.0144 | 0.2771 | 0.0520 |
|             | Sp | 504  | 0.0200 | 0.2665 | 0.0751 |
|             | Me | 504  | 0.0151 | 0.3155 | 0.0478 |
|             | Rc | 504  | 0.0136 | 0.2583 | 0.0528 |
| <b>rps4</b> | Bc | 603  | 0.0634 | 0.2262 | 0.2803 |
|             | Br | 603  | 0.0605 | 0.2290 | 0.2641 |

|             |    |     |        |        |        |
|-------------|----|-----|--------|--------|--------|
|             | Ci | 603 | 0.0805 | 0.1999 | 0.4024 |
|             | Hr | 603 | 0.0794 | 0.1943 | 0.4083 |
|             | Vs | 603 | 0.0729 | 0.1925 | 0.3785 |
|             | Pa | 603 | 0.0545 | 0.1690 | 0.3226 |
|             | Sp | 603 | 0.0577 | 0.1765 | 0.3269 |
|             | Me | 603 | 0.0484 | 0.1888 | 0.2565 |
|             | Rc | 603 | 0.0542 | 0.1856 | 0.2922 |
| <b>ndhJ</b> | Bc | 474 | 0.0279 | 0.1720 | 0.1621 |
|             | Br | 474 | 0.0286 | 0.1817 | 0.1571 |
|             | Ci | 474 | 0.0216 | 0.1853 | 0.1166 |
|             | Hr | 474 | 0.0198 | 0.1743 | 0.1138 |
|             | Vs | 474 | 0.0209 | 0.2197 | 0.0953 |
|             | Pa | 471 | 0.0207 | 0.1837 | 0.1128 |
|             | Sp | 471 | 0.0197 | 0.2110 | 0.0933 |
|             | Me | 474 | 0.0196 | 0.1817 | 0.1080 |
|             | Rc | 474 | 0.0249 | 0.1996 | 0.1250 |
| <b>ndhK</b> | Bc | 669 | 0.0409 | 0.4929 | 0.0830 |
|             | Br | 816 | 0.0420 | 0.4638 | 0.0905 |
|             | Ci | 843 | 0.0481 | 0.3855 | 0.1248 |
|             | Hr | 846 | 0.0466 | 0.3794 | 0.1228 |
|             | Vs | 843 | 0.0559 | 0.3976 | 0.1405 |
|             | Pa | 852 | 0.0451 | 0.2980 | 0.1513 |
|             | Sp | 852 | 0.0450 | 0.3274 | 0.1375 |
|             | Me | 819 | 0.0456 | 0.3150 | 0.1449 |
|             | Rc | 846 | 0.0506 | 0.2465 | 0.2053 |
| <b>ndhC</b> | Bc | 357 | 0.0484 | 0.3930 | 0.1233 |
|             | Br | 357 | 0.0484 | 0.3930 | 0.1233 |
|             | Ci | 360 | 0.0760 | 0.6803 | 0.1117 |
|             | Hr | 360 | 0.0650 | 0.4356 | 0.1493 |

|             |    |      |        |        |        |
|-------------|----|------|--------|--------|--------|
|             | Vs | 360  | 0.0739 | 0.5236 | 0.1411 |
|             | Pa | 360  | 0.0551 | 0.8256 | 0.0667 |
|             | Sp | 360  | 0.0509 | 0.8257 | 0.0616 |
|             | Me | 360  | 0.0731 | 0.4034 | 0.1812 |
|             | Rc | 360  | 0.0660 | 0.4913 | 0.1344 |
| <b>atpE</b> | Bc | 396  | 0.3333 | 0.2154 | 1.5471 |
|             | Br | 396  | 0.3340 | 0.2053 | 1.6269 |
|             | Ci | 396  | 0.0386 | 0.1913 | 0.2018 |
|             | Hr | 396  | 0.0386 | 0.1913 | 0.2018 |
|             | Vs | 399  | 0.0409 | 0.1911 | 0.2141 |
|             | Pa | 396  | 0.0341 | 0.2118 | 0.1609 |
|             | Sp | 396  | 0.0368 | 0.2110 | 0.1744 |
|             | Me | 399  | 0.0280 | 0.1967 | 0.1422 |
|             | Rc | 396  | 0.0383 | 0.1872 | 0.2043 |
| <b>atpB</b> | Bc | 1494 | 0.0301 | 0.3375 | 0.0893 |
|             | Br | 1494 | 0.0301 | 0.3425 | 0.0878 |
|             | Ci | 1494 | 0.0289 | 0.4139 | 0.0699 |
|             | Hr | 1494 | 0.0280 | 0.4166 | 0.0671 |
|             | Vs | 1494 | 0.0351 | 0.4505 | 0.0779 |
|             | Pa | 1494 | 0.0284 | 0.3217 | 0.0884 |
|             | Sp | 1494 | 0.0304 | 0.3329 | 0.0912 |
|             | Me | 1491 | 0.0255 | 0.2825 | 0.0904 |
|             | Rc | 1494 | 0.0248 | 0.3483 | 0.0712 |
| <b>rbcL</b> | Bc | 1425 | 0.0192 | 0.2792 | 0.0689 |
|             | Br | 1425 | 0.0165 | 0.2773 | 0.0598 |
|             | Ci | 1425 | 0.0144 | 0.3625 | 0.0397 |
|             | Hr | 1425 | 0.0150 | 0.3854 | 0.0390 |
|             | Vs | 1425 | 0.0171 | 0.4335 | 0.0395 |
|             | Pa | 1425 | 0.0154 | 0.2843 | 0.0541 |

|             |    |      |        |        |        |
|-------------|----|------|--------|--------|--------|
|             | Sp | 1431 | 0.0155 | 0.3118 | 0.0497 |
|             | Me | 1431 | 0.0161 | 0.2815 | 0.0573 |
|             | Rc | 1425 | 0.0150 | 0.2983 | 0.0504 |
| <b>accD</b> | Bc | 1470 | 0.1552 | 0.4397 | 0.3530 |
|             | Br | 924  | 0.0807 | 0.3549 | 0.2274 |
|             | Ci | 1458 | 0.1685 | 0.4095 | 0.4115 |
|             | Hr | 1443 | 0.1727 | 0.3950 | 0.4373 |
|             | Vs | 1245 | 0.1131 | 0.5223 | 0.2165 |
|             | Pa | 1467 | 0.1620 | 0.3450 | 0.4696 |
|             | Sp | 1458 | 0.1645 | 0.3702 | 0.4445 |
|             | Me | 1233 | 0.1117 | 0.3542 | 0.3153 |
|             | Rc | 1500 | 0.1557 | 0.2964 | 0.5252 |
| <b>psaI</b> | Bc | 105  | 0.0560 | 0.0703 | 0.7975 |
|             | Br | 105  | 0.0560 | 0.0703 | 0.7975 |
|             | Ci | 108  | 0.0752 | 0.1414 | 0.5320 |
|             | Hr | 108  | 0.0752 | 0.1414 | 0.5320 |
|             | Vs | 108  | 0.0565 | 0.5684 | 0.0994 |
|             | Pa | 105  | 0.0549 | 0.5502 | 0.0998 |
|             | Sp | 105  | 0.0549 | 0.5502 | 0.0998 |
|             | Me | 105  | 0.0549 | 0.6828 | 0.0804 |
|             | Rc | 105  | 0.0599 | 0.1786 | 0.3355 |
| <b>ycf4</b> | Bc | 552  | 0.0314 | 0.1896 | 0.1659 |
|             | Br | 552  | 0.0314 | 0.1896 | 0.1659 |
|             | Ci | 552  | 0.0562 | 0.2357 | 0.2385 |
|             | Hr | 552  | 0.0563 | 0.2266 | 0.2484 |
|             | Vs | 549  | 0.0462 | 0.2505 | 0.1844 |
|             | Pa | 552  | 0.0377 | 0.1690 | 0.2230 |
|             | Sp | 552  | 0.0412 | 0.1768 | 0.2328 |
|             | Me | 552  | 0.0415 | 0.2034 | 0.2040 |

|             |    |     |        |        |        |
|-------------|----|-----|--------|--------|--------|
|             | Rc | 552 | 0.0362 | 0.2075 | 0.1744 |
| <b>cemA</b> | Bc | 684 | 0.1297 | 0.1936 | 0.6700 |
|             | Br | 684 | 0.1247 | 0.2025 | 0.6159 |
|             | Ci | 687 | 0.1415 | 0.2192 | 0.6456 |
|             | Hr | 681 | 0.1376 | 0.2520 | 0.5462 |
|             | Vs | 684 | 0.1244 | 0.2827 | 0.4400 |
|             | Pa | 681 | 0.1250 | 0.2342 | 0.5336 |
|             | Sp | 681 | 0.1347 | 0.2159 | 0.6238 |
|             | Me | 678 | 0.1229 | 0.2795 | 0.4396 |
|             | Rc | 681 | 0.1255 | 0.2780 | 0.4515 |
| <b>petA</b> | Bc | 960 | 0.0424 | 0.3453 | 0.1230 |
|             | Br | 960 | 0.0442 | 0.3505 | 0.1263 |
|             | Ci | 960 | 0.0385 | 0.3149 | 0.1224 |
|             | Hr | 960 | 0.0368 | 0.3298 | 0.1117 |
|             | Vs | 960 | 0.0463 | 0.3899 | 0.1187 |
|             | Pa | 960 | 0.0402 | 0.2581 | 0.1558 |
|             | Sp | 960 | 0.0386 | 0.3015 | 0.1282 |
|             | Me | 960 | 0.0315 | 0.2446 | 0.1287 |
|             | Rc | 960 | 0.0348 | 0.2614 | 0.1332 |
| <b>psbJ</b> | Bc | 120 | 0.0485 | 0.2212 | 0.2196 |
|             | Br | 120 | 0.0485 | 0.2212 | 0.2196 |
|             | Ci | 120 | 0.0153 | 0.7048 | 0.0218 |
|             | Hr | 120 | 0.0165 | 0.6239 | 0.0264 |
|             | Vs | 120 | 0.0308 | 0.2990 | 0.1031 |
|             | Pa | 120 | 0.0290 | 0.4687 | 0.0618 |
|             | Sp | 120 | 0.0294 | 0.3595 | 0.0818 |
|             | Me | 120 | 0.0271 | 0.4358 | 0.0622 |
|             | Rc | 120 | 0.0142 | 0.4540 | 0.0313 |
| <b>psbL</b> | Bc | 114 | 0.0001 | 0.1697 | 0.0010 |



|             |    |     |        |        |        |
|-------------|----|-----|--------|--------|--------|
|             | Br | 114 | 0.0001 | 0.1697 | 0.0010 |
|             | Ci | 114 | 0.0006 | 0.7364 | 0.0009 |
|             | Hr | 114 | 0.0006 | 0.7364 | 0.0009 |
|             | Vs | 114 | 0.0010 | 0.3733 | 0.0027 |
|             | Pa | 114 | 0.0011 | 0.8262 | 0.0013 |
|             | Sp | 114 | 0.0011 | 0.8249 | 0.0014 |
|             | Me | 114 | 0.0010 | 0.3707 | 0.0028 |
|             | Rc | 114 | 0.0009 | 0.1694 | 0.0056 |
| <b>psbF</b> | Bc | 117 | 0.0120 | 0.2301 | 0.0522 |
|             | Br | 117 | 0.0120 | 0.2301 | 0.0522 |
|             | Ci | 117 | 0.0001 | 0.1834 | 0.0008 |
|             | Hr | 117 | 0.0001 | 0.1834 | 0.0008 |
|             | Vs | 117 | 0.0061 | 0.1828 | 0.0333 |
|             | Pa | 117 | 0.0056 | 0.1709 | 0.0329 |
|             | Sp | 117 | 0.0056 | 0.1709 | 0.0329 |
|             | Me | 117 | 0.0057 | 0.1039 | 0.0550 |
|             | Rc | 117 | 0.0057 | 0.1043 | 0.0543 |
| <b>psbE</b> | Bc | 249 | 0.0103 | 0.2955 | 0.0351 |
|             | Br | 249 | 0.0103 | 0.2955 | 0.0351 |
|             | Ci | 249 | 0.0112 | 0.3986 | 0.0282 |
|             | Hr | 249 | 0.0142 | 0.3757 | 0.0378 |
|             | Vs | 249 | 0.0121 | 0.4978 | 0.0243 |
|             | Pa | 249 | 0.0005 | 0.3350 | 0.0016 |
|             | Sp | 249 | 0.0116 | 0.3251 | 0.0355 |
|             | Me | 249 | 0.0060 | 0.5026 | 0.0120 |
|             | Rc | 249 | 0.0055 | 0.3970 | 0.0139 |
| <b>petL</b> | Bc | 93  | 0.0775 | 0.1091 | 0.7106 |
|             | Br | 93  | 0.0775 | 0.1091 | 0.7106 |
|             | Ci | 93  | 0.0878 | 0.5650 | 0.1554 |

|              |    |     |        |        |        |
|--------------|----|-----|--------|--------|--------|
|              | Hr | 93  | 0.0878 | 0.5650 | 0.1554 |
|              | Vs | 93  | 0.1170 | 0.8299 | 0.1410 |
|              | Pa | 93  | 0.1620 | 0.7745 | 0.2092 |
|              | Sp | 93  | 0.2237 | 0.6629 | 0.3375 |
|              | Me | 93  | 0.0505 | 0.1082 | 0.4665 |
|              | Rc | 93  | 0.0234 | 0.1046 | 0.2239 |
| <b>petG</b>  | Bc | 111 | 0.0134 | 0.1601 | 0.0836 |
|              | Br | 111 | 0.0134 | 0.1601 | 0.0836 |
|              | Ci | 111 | 0.0134 | 0.1689 | 0.0794 |
|              | Hr | 111 | 0.0134 | 0.2135 | 0.0628 |
|              | Vs | 111 | 0.0335 | 0.5444 | 0.0615 |
|              | Pa | 111 | 0.0134 | 0.2616 | 0.0512 |
|              | Sp | 111 | 0.0201 | 0.3325 | 0.0604 |
|              | Me | 111 | 0.0134 | 0.1646 | 0.0814 |
|              | Rc | 111 | 0.0122 | 0.1284 | 0.0950 |
| <b>psaJ</b>  | Bc | 123 | 0.0816 | 0.5359 | 0.1523 |
|              | Br | 123 | 0.0816 | 0.5359 | 0.1523 |
|              | Ci | 132 | 0.0254 | 0.8005 | 0.0317 |
|              | Hr | 132 | 0.0254 | 0.8005 | 0.0317 |
|              | Vs | 132 | 0.0529 | 0.2687 | 0.1967 |
|              | Pa | 132 | 0.0582 | 0.4303 | 0.1353 |
|              | Sp | 132 | 0.0499 | 0.3411 | 0.1464 |
|              | Me | 132 | 0.0507 | 0.3314 | 0.1531 |
|              | Rc | 132 | 0.0809 | 0.2266 | 0.3570 |
| <b>rpl33</b> | Bc | 198 | 0.0639 | 0.4228 | 0.1513 |
|              | Br | 198 | 0.0639 | 0.4228 | 0.1513 |
|              | Ci | 198 | 0.0816 | 0.3656 | 0.2232 |
|              | Hr | 198 | 0.0816 | 0.3656 | 0.2232 |
|              | Vs | 198 | 0.0797 | 0.3284 | 0.2426 |

|              |    |     |        |        |        |
|--------------|----|-----|--------|--------|--------|
|              | Pa | 198 | 0.0765 | 0.6341 | 0.1207 |
|              | Sp | 198 | 0.0789 | 0.5649 | 0.1397 |
|              | Me | 198 | 0.0962 | 0.5047 | 0.1907 |
|              | Rc | 198 | 0.0591 | 0.5266 | 0.1122 |
| <b>rps18</b> | Bc | 300 | 0.1143 | 0.3007 | 0.3800 |
|              | Br | 300 | 0.1143 | 0.3007 | 0.3800 |
|              | Ci | 258 | 0.0906 | 0.3185 | 0.2844 |
|              | Hr | 258 | 0.0906 | 0.3185 | 0.2844 |
|              | Vs | 258 | 0.0897 | 0.2339 | 0.3837 |
|              | Pa | 300 | 0.1226 | 0.1815 | 0.6756 |
|              | Sp | 300 | 0.1219 | 0.1515 | 0.8047 |
|              | Me | 258 | 0.0497 | 0.1735 | 0.2865 |
|              | Rc | 258 | 0.0409 | 0.1950 | 0.2096 |
| <b>rpl20</b> | Bc | 366 | 0.1498 | 0.3277 | 0.4571 |
|              | Br | 366 | 0.1498 | 0.3277 | 0.4571 |
|              | Ci | 366 | 0.1234 | 0.3745 | 0.3295 |
|              | Hr | 366 | 0.1337 | 0.3271 | 0.4089 |
|              | Vs | 348 | 0.1478 | 0.4359 | 0.3390 |
|              | Pa | 369 | 0.1377 | 0.3233 | 0.4258 |
|              | Sp | 369 | 0.1492 | 0.3488 | 0.4278 |
|              | Me | 351 | 0.0743 | 0.3775 | 0.1969 |
|              | Rc | 375 | 0.1035 | 0.3802 | 0.2723 |
| <b>rps12</b> | Bc | 114 | 0.0932 | 0.1870 | 0.4987 |
|              | Br | 114 | 0.0932 | 0.1870 | 0.4987 |
|              | Ci | 114 | 0.0903 | 0.3023 | 0.2986 |
|              | Hr | 114 | 0.0903 | 0.3023 | 0.2986 |
|              | Vs | 114 | 0.0925 | 0.3112 | 0.2971 |
|              | Pa | 114 | 0.0939 | 0.3119 | 0.3011 |
|              | Sp | 114 | 0.0939 | 0.3119 | 0.3011 |

|             |    |      |        |        |        |
|-------------|----|------|--------|--------|--------|
|             | Me | 114  | 0.0932 | 0.1863 | 0.5003 |
|             | Rc | 114  | 0.1805 | 0.2030 | 0.8895 |
| <b>clpP</b> | Bc | 582  | 0.0660 | 0.2564 | 0.2574 |
|             | Br | 579  | 0.0636 | 0.2578 | 0.2467 |
|             | Ci | 579  | 0.0642 | 0.2534 | 0.2536 |
|             | Hr | 579  | 0.0639 | 0.2629 | 0.2431 |
|             | Vs | 1680 | 0.2536 | 0.1373 | 1.8474 |
|             | Pa | 579  | 0.0820 | 0.2030 | 0.4038 |
|             | Sp | 522  | 0.0815 | 0.2350 | 0.3469 |
|             | Me | 579  | 0.0714 | 0.2528 | 0.2824 |
|             | Rc | 579  | 0.0732 | 0.2451 | 0.2985 |
| <b>psbB</b> | Bc | 1518 | 0.0101 | 0.3807 | 0.0266 |
|             | Br | 1518 | 0.0101 | 0.3807 | 0.0266 |
|             | Ci | 1518 | 0.0051 | 0.4283 | 0.0119 |
|             | Hr | 1518 | 0.0062 | 0.4215 | 0.0147 |
|             | Vs | 1518 | 0.0073 | 0.5720 | 0.0128 |
|             | Pa | 1518 | 0.0085 | 0.3703 | 0.0229 |
|             | Sp | 1518 | 0.0090 | 0.3710 | 0.0244 |
|             | Me | 1518 | 0.0041 | 0.3443 | 0.0118 |
|             | Rc | 1518 | 0.0062 | 0.4323 | 0.0144 |
| <b>psbT</b> | Bc | 114  | 0.0135 | 0.1883 | 0.0717 |
|             | Br | 108  | 0.0001 | 0.1548 | 0.0010 |
|             | Ci | 108  | 0.0122 | 0.5445 | 0.0224 |
|             | Hr | 108  | 0.0002 | 0.3275 | 0.0006 |
|             | Vs | 108  | 0.0001 | 0.2516 | 0.0004 |
|             | Pa | 108  | 0.0002 | 0.3374 | 0.0006 |
|             | Sp | 108  | 0.0003 | 0.5618 | 0.0005 |
|             | Me | 108  | 0.0123 | 0.6944 | 0.0177 |
|             | Rc | 108  | 0.0130 | 0.7906 | 0.0164 |

|             |    |     |        |        |        |
|-------------|----|-----|--------|--------|--------|
| <b>psbN</b> | Bc | 129 | 0.0001 | 0.1192 | 0.0010 |
|             | Br | 129 | 0.0001 | 0.1192 | 0.0010 |
|             | Ci | 129 | 0.0001 | 0.2027 | 0.0005 |
|             | Hr | 129 | 0.0001 | 0.2027 | 0.0005 |
|             | Vs | 129 | 0.0001 | 0.0960 | 0.0011 |
|             | Pa | 129 | 0.0001 | 0.0954 | 0.0011 |
|             | Sp | 129 | 0.0001 | 0.1244 | 0.0008 |
|             | Me | 129 | 0.0001 | 0.0954 | 0.0011 |
|             | Rc | 129 | 0.0000 | 0.0979 | 0.0002 |
| <b>psbH</b> | Bc | 219 | 0.0250 | 0.2963 | 0.0845 |
|             | Br | 219 | 0.0250 | 0.2963 | 0.0845 |
|             | Ci | 219 | 0.0442 | 0.2705 | 0.1635 |
|             | Hr | 219 | 0.0442 | 0.2705 | 0.1635 |
|             | Vs | 219 | 0.0482 | 0.2026 | 0.2377 |
|             | Pa | 219 | 0.0210 | 0.1826 | 0.1150 |
|             | Sp | 219 | 0.0216 | 0.2234 | 0.0965 |
|             | Me | 219 | 0.0258 | 0.2576 | 0.1003 |
|             | Rc | 219 | 0.0165 | 0.2516 | 0.0654 |
| <b>petB</b> | Bc | 645 | 0.0083 | 0.3268 | 0.0255 |
|             | Br | 645 | 0.0083 | 0.3268 | 0.0255 |
|             | Ci | 645 | 0.0073 | 0.5609 | 0.0131 |
|             | Hr | 645 | 0.0073 | 0.5835 | 0.0126 |
|             | Vs | 345 | 0.0075 | 0.5539 | 0.0135 |
|             | Pa | 645 | 0.0101 | 0.3909 | 0.0258 |
|             | Sp | 645 | 0.0048 | 0.4235 | 0.0114 |
|             | Me | 645 | 0.0052 | 0.3576 | 0.0147 |
|             | Rc | 645 | 0.0055 | 0.3193 | 0.0172 |
| <b>petD</b> | Bc | 522 | 0.0097 | 0.2354 | 0.0411 |
|             | Br | 522 | 0.0072 | 0.2404 | 0.0301 |

|              |    |      |        |        |        |
|--------------|----|------|--------|--------|--------|
|              | Ci | 522  | 0.0115 | 0.3139 | 0.0365 |
|              | Hr | 522  | 0.0118 | 0.2748 | 0.0428 |
|              | Vs | 522  | 0.0095 | 0.2358 | 0.0403 |
|              | Pa | 522  | 0.0095 | 0.1990 | 0.0478 |
|              | Sp | 522  | 0.0096 | 0.2175 | 0.0442 |
|              | Me | 522  | 0.0053 | 0.2626 | 0.0201 |
|              | Rc | 522  | 0.0077 | 0.2345 | 0.0330 |
| <b>rpoA</b>  | Bc | 999  | 0.0689 | 0.4018 | 0.1714 |
|              | Br | 987  | 0.0719 | 0.3832 | 0.1877 |
|              | Ci | 1005 | 0.0655 | 0.3661 | 0.1788 |
|              | Hr | 1005 | 0.0651 | 0.4037 | 0.1612 |
|              | Vs | 972  | 0.0632 | 0.4257 | 0.1485 |
|              | Pa | 1008 | 0.0613 | 0.2640 | 0.2324 |
|              | Sp | 1008 | 0.0574 | 0.2728 | 0.2105 |
|              | Me | 1002 | 0.0534 | 0.3099 | 0.1723 |
|              | Rc | 975  | 0.0570 | 0.2733 | 0.2085 |
| <b>rps11</b> | Bc | 414  | 0.1138 | 0.3385 | 0.3361 |
|              | Br | 405  | 0.1291 | 0.4439 | 0.2909 |
|              | Ci | 414  | 0.1315 | 0.3805 | 0.3456 |
|              | Hr | 414  | 0.1315 | 0.3638 | 0.3615 |
|              | Vs | 414  | 0.1153 | 0.3484 | 0.3309 |
|              | Pa | 414  | 0.1289 | 0.4892 | 0.2635 |
|              | Sp | 414  | 0.1286 | 0.4716 | 0.2727 |
|              | Me | 414  | 0.0931 | 0.3415 | 0.2725 |
|              | Rc | 414  | 0.1000 | 0.3390 | 0.2950 |
| <b>rpl36</b> | Bc | 111  | 0.0915 | 0.9150 | 0.1000 |
|              | Br | 111  | 0.0915 | 0.9150 | 0.1000 |
|              | Ci | 111  | 0.1300 | 0.7194 | 0.1807 |
|              | Hr | 111  | 0.1897 | 0.7274 | 0.2607 |

|              |    |     |        |        |        |
|--------------|----|-----|--------|--------|--------|
|              | Vs | 111 | 0.0023 | 0.5700 | 0.0041 |
|              | Pa | 111 | 0.1752 | 0.4264 | 0.4110 |
|              | Sp | 111 | 0.0555 | 0.5365 | 0.1034 |
|              | Me | 111 | 0.0601 | 0.6598 | 0.0911 |
|              | Rc | 111 | 0.0662 | 1.1525 | 0.0574 |
| <b>infA</b>  | Bc | -   | -      | -      | -      |
|              | Br | -   | -      | -      | -      |
|              | Ci | 81  | 0.2043 | 0.7765 | 0.2631 |
|              | Hr | 102 | 0.2192 | 0.6432 | 0.3408 |
|              | Vs | -   | -      | -      | -      |
|              | Pa | 156 | 0.3504 | 0.2735 | 1.2809 |
|              | Sp | 159 | 0.3497 | 0.3877 | 0.9019 |
|              | Me | -   | -      | -      | -      |
|              | Rc | 54  | 0.3865 | 0.7774 | 0.4972 |
| <b>rps8</b>  | Bc | 402 | 0.1035 | 0.4594 | 0.2253 |
|              | Br | 402 | 0.1035 | 0.4594 | 0.2253 |
|              | Ci | 402 | 0.1283 | 0.6471 | 0.1982 |
|              | Hr | 402 | 0.1230 | 0.5648 | 0.2177 |
|              | Vs | 402 | 0.1161 | 0.4936 | 0.2352 |
|              | Pa | 402 | 0.1048 | 0.4006 | 0.2615 |
|              | Sp | 402 | 0.1025 | 0.4234 | 0.2420 |
|              | Me | 402 | 0.0942 | 0.6259 | 0.1506 |
|              | Rc | 402 | 0.0936 | 0.5946 | 0.1573 |
| <b>rpl14</b> | Bc | 366 | 0.0989 | 0.3345 | 0.2957 |
|              | Br | 366 | 0.0989 | 0.3345 | 0.2957 |
|              | Ci | 366 | 0.1854 | 0.3859 | 0.4803 |
|              | Hr | 366 | 0.1861 | 0.3880 | 0.4797 |
|              | Vs | 366 | 0.1749 | 0.3908 | 0.4476 |
|              | Pa | 366 | 0.1175 | 0.2951 | 0.3981 |

|              |    |     |        |        |        |
|--------------|----|-----|--------|--------|--------|
|              | Sp | 366 | 0.1216 | 0.3497 | 0.3477 |
|              | Me | 366 | 0.1044 | 0.2228 | 0.4688 |
|              | Rc | 366 | 0.0936 | 0.2506 | 0.3737 |
| <b>rpl16</b> | Bc | 396 | 0.0423 | 0.2850 | 0.1486 |
|              | Br | 396 | 0.0423 | 0.2850 | 0.1486 |
|              | Ci | 396 | 0.0385 | 0.2742 | 0.1404 |
|              | Hr | 396 | 0.0382 | 0.2971 | 0.1285 |
|              | Vs | 396 | 0.0501 | 0.3047 | 0.1643 |
|              | Pa | 393 | 0.0459 | 0.2143 | 0.2140 |
|              | Sp | 393 | 0.0497 | 0.2170 | 0.2291 |
|              | Me | 396 | 0.0330 | 0.2701 | 0.1222 |
|              | Rc | 396 | 0.0299 | 0.2304 | 0.1299 |
| <b>rps3</b>  | Bc | 654 | 0.1132 | 0.4355 | 0.2600 |
|              | Br | 654 | 0.1177 | 0.4364 | 0.2697 |
|              | Ci | 654 | 0.1855 | 0.5303 | 0.3498 |
|              | Hr | 654 | 0.1873 | 0.5064 | 0.3698 |
|              | Vs | 651 | 0.1381 | 0.5707 | 0.2420 |
|              | Pa | 654 | 0.1711 | 0.5521 | 0.3098 |
|              | Sp | 654 | 0.1771 | 0.5929 | 0.2987 |
|              | Me | 654 | 0.1161 | 0.5340 | 0.2174 |
|              | Rc | 654 | 0.1152 | 0.5967 | 0.1930 |
| <b>rpl22</b> | Bc | 387 | 0.1553 | 0.5810 | 0.2674 |
|              | Br | 378 | 0.1218 | 0.4816 | 0.2528 |
|              | Ci | 402 | 0.1789 | 0.6641 | 0.2693 |
|              | Hr | 381 | 0.1157 | 0.6330 | 0.1828 |
|              | Vs | 435 | 0.1425 | 0.6519 | 0.2185 |
|              | Pa | 363 | 0.1364 | 0.4166 | 0.3274 |
|              | Sp | 417 | 0.1801 | 0.3607 | 0.4992 |
|              | Me | 378 | 0.1093 | 0.5044 | 0.2168 |



|              |    |      |        |        |        |
|--------------|----|------|--------|--------|--------|
|              | Rc | 276  | 0.1801 | 0.3607 | 0.4992 |
| <b>rps19</b> | Bc | 276  | 0.0319 | 0.5732 | 0.0557 |
|              | Br | 273  | 0.0322 | 0.5658 | 0.0570 |
|              | Ci | 276  | 0.0446 | 0.5681 | 0.0784 |
|              | Hr | 276  | 0.0446 | 0.5681 | 0.0784 |
|              | Vs | 276  | 0.0530 | 0.8429 | 0.0629 |
|              | Pa | 276  | 0.0474 | 0.7993 | 0.0593 |
|              | Sp | 276  | 0.0476 | 0.8433 | 0.0565 |
|              | Me | 276  | 0.0249 | 0.5242 | 0.0474 |
|              | Rc | 276  | 0.0199 | 0.4006 | 0.0497 |
| <b>rpl2</b>  | Bc | 819  | 0.0173 | 0.0691 | 0.2504 |
|              | Br | 822  | 0.0153 | 0.0705 | 0.2177 |
|              | Ci | 663  | 0.0240 | 0.0867 | 0.2769 |
|              | Hr | 666  | 0.0239 | 0.0869 | 0.2746 |
|              | Vs | 645  | 0.0253 | 0.1081 | 0.2339 |
|              | Pa | 666  | 0.0267 | 0.0699 | 0.3821 |
|              | Sp | 663  | 0.0212 | 0.0696 | 0.3042 |
|              | Me | 666  | 0.0246 | 0.0602 | 0.4078 |
|              | Rc | 666  | 0.0246 | 0.0592 | 0.4152 |
| <b>rpl23</b> | Bc | 270  | 0.0461 | 0.0528 | 0.8734 |
|              | Br | 270  | 0.0461 | 0.0528 | 0.8734 |
|              | Ci | 279  | 0.0349 | 0.0807 | 0.4328 |
|              | Hr | 279  | 0.0274 | 0.0800 | 0.3419 |
|              | Vs | 279  | 0.0266 | 0.0525 | 0.5076 |
|              | Pa | 279  | 0.0410 | 0.0640 | 0.6417 |
|              | Sp | 279  | 0.0497 | 0.0618 | 0.8035 |
|              | Me | 279  | 0.0270 | 0.0518 | 0.5210 |
|              | Rc | 279  | 0.0265 | 0.0868 | 0.3050 |
| <b>ycf2</b>  | Bc | 6801 | 0.0437 | 0.0642 | 0.6805 |

|              |    |      |        |        |        |
|--------------|----|------|--------|--------|--------|
|              | Br | 6804 | 0.0437 | 0.0633 | 0.6902 |
|              | Ci | 6801 | 0.0435 | 0.0572 | 0.7603 |
|              | Hr | 6819 | 0.0452 | 0.0580 | 0.7800 |
|              | Vs | 6753 | 0.0496 | 0.0615 | 0.8071 |
|              | Pa | 6789 | 0.0399 | 0.0576 | 0.6932 |
|              | Sp | 6783 | 0.0408 | 0.0633 | 0.6450 |
|              | Me | 6726 | 0.0422 | 0.0500 | 0.8441 |
|              | Rc | 6810 | 0.0415 | 0.0549 | 0.7554 |
| <b>ycf15</b> | Bc | 150  | 0.8765 | 0.8014 | 1.0938 |
|              | Br | 144  | 0.8257 | 0.7360 | 1.1218 |
|              | Ci | 198  | 0.4305 | 0.5894 | 0.7305 |
|              | Hr | 162  | 0.2320 | 0.4257 | 0.5450 |
|              | Vs | 165  | 0.3355 | 0.1956 | 1.7155 |
|              | Pa | 198  | 0.3078 | 0.2066 | 1.4901 |
|              | Sp | 180  | 0.3150 | 0.2120 | 1.4864 |
|              | Me | 177  | 0.3683 | 0.2847 | 1.2937 |
|              | Rc | 198  | 0.3375 | 0.6116 | 0.5518 |
| <b>ndhB</b>  | Bc | 1530 | 0.0132 | 0.0286 | 0.4642 |
|              | Br | 1530 | 0.0132 | 0.0286 | 0.4642 |
|              | Ci | 1530 | 0.0139 | 0.0350 | 0.3971 |
|              | Hr | 1530 | 0.0139 | 0.0331 | 0.4201 |
|              | Vs | 1530 | 0.0144 | 0.0279 | 0.5149 |
|              | Pa | 1530 | 0.0129 | 0.0300 | 0.4299 |
|              | Sp | 1530 | 0.0128 | 0.0316 | 0.4045 |
|              | Me | 465  | 0.0100 | 0.0280 | 0.3578 |
|              | Rc | 1530 | 0.0085 | 0.0270 | 0.3152 |
| <b>rps7</b>  | Bc | 465  | 0.0095 | 0.0555 | 0.1709 |
|              | Br | 465  | 0.0109 | 0.0554 | 0.1982 |
|              | Ci | 465  | 0.0041 | 0.0456 | 0.0904 |

|                   |    |     |        |        |        |
|-------------------|----|-----|--------|--------|--------|
|                   | Hr | 465 | 0.0041 | 0.0456 | 0.0904 |
|                   | Vs | 465 | 0.0096 | 0.0299 | 0.3196 |
|                   | Pa | 465 | 0.0094 | 0.0386 | 0.2439 |
|                   | Sp | 306 | 0.0162 | 0.0540 | 0.2997 |
|                   | Me | 465 | 0.0054 | 0.0303 | 0.1790 |
|                   | Rc | 465 | 0.0082 | 0.0297 | 0.2765 |
| <b>rps12_3end</b> | Bc | 249 | 0.0001 | 0.0175 | 0.0010 |
|                   | Br | 249 | 0.0001 | 0.0175 | 0.0010 |
|                   | Ci | 249 | 0.0001 | 0.0275 | 0.0038 |
|                   | Hr | 249 | 0.0001 | 0.0275 | 0.0038 |
|                   | Vs | 249 | 0.0001 | 0.0287 | 0.0043 |
|                   | Pa | 249 | 0.0001 | 0.0274 | 0.0038 |
|                   | Sp | 249 | 0.0001 | 0.0078 | 0.0169 |
|                   | Me | 249 | 0.0002 | 0.0185 | 0.0108 |
|                   | Rc | 249 | 0.0001 | 0.0293 | 0.0038 |
| <b>rps12</b>      | Bc | 240 | 0.0001 | 0.0181 | 0.0010 |
|                   | Br | 240 | 0.0001 | 0.0181 | 0.0010 |
|                   | Ci | 240 | 0.0001 | 0.0281 | 0.0033 |
|                   | Hr | 240 | 0.0001 | 0.0281 | 0.0033 |
|                   | Vs | 240 | 0.0001 | 0.0296 | 0.0036 |
|                   | Pa | 240 | 0.0001 | 0.0281 | 0.0033 |
|                   | Sp | 240 | 0.0001 | 0.0081 | 0.0143 |
|                   | Me | 240 | 0.0001 | 0.0191 | 0.0052 |
|                   | Rc | 240 | 0.0001 | 0.0301 | 0.0032 |
| <b>ycf68</b>      | Bc | 159 | 0.0543 | 0.0545 | 0.9980 |
|                   | Br | 159 | 0.0406 | 0.0446 | 0.9093 |
|                   | Ci | 165 | 0.0680 | 0.0197 | 3.4490 |
|                   | Hr | 165 | 0.0584 | 0.0573 | 1.0188 |
|                   | Vs | 162 | 0.0098 | 0.0219 | 0.4476 |

|              |    |      |        |        |        |
|--------------|----|------|--------|--------|--------|
|              | Pa | 57   | 0.1918 | 0.8331 | 0.2302 |
|              | Sp | 165  | 0.0274 | 0.0451 | 0.6075 |
|              | Me | 168  | 0.0201 | 0.0364 | 0.5536 |
|              | Rc | 57   | 0.0203 | 0.7823 | 0.0259 |
| <b>orf42</b> | Bc | 120  | 0.0459 | 0.0872 | 0.5264 |
|              | Br | 120  | 0.0459 | 0.0872 | 0.5264 |
|              | Ci | 120  | 0.1457 | 0.0727 | 2.0044 |
|              | Hr | 120  | 0.1457 | 0.0727 | 2.0044 |
|              | Vs | 120  | 0.1343 | 0.0902 | 1.4884 |
|              | Pa | 120  | 0.0973 | 0.0742 | 1.3102 |
|              | Sp | 120  | 0.1461 | 0.0718 | 2.0354 |
|              | Me | 120  | 0.0510 | 0.1626 | 0.3137 |
|              | Rc | 120  | 0.0510 | 0.1626 | 0.3137 |
| <b>orf56</b> | Bc | 60   | 0.0942 | 0.1156 | 0.8149 |
|              | Br | 54   | 0.0643 | 0.1647 | 0.3906 |
|              | Ci | 72   | 0.0456 | 0.1170 | 0.3898 |
|              | Hr | 72   | 0.0456 | 0.1170 | 0.3898 |
|              | Vs | 72   | 0.0219 | 0.1171 | 0.1870 |
|              | Pa | 72   | 0.0219 | 0.1171 | 0.1870 |
|              | Sp | 72   | 0.0456 | 0.1173 | 0.3888 |
|              | Me | 69   | 0.0222 | 0.1286 | 0.1728 |
|              | Rc | 66   | 0.0218 | 0.0660 | 0.3297 |
| <b>ycf1</b>  | Bc | 984  | 0.0801 | 0.0722 | 1.1094 |
|              | Br | 984  | 0.0787 | 0.0716 | 1.0992 |
|              | Ci | 984  | 0.0839 | 0.1047 | 0.8019 |
|              | Hr | 978  | 0.0809 | 0.1053 | 0.7678 |
|              | Vs | 5151 | 0.2827 | 0.4851 | 0.5828 |
|              | Pa | 975  | 0.0613 | 0.0596 | 1.0284 |
|              | Sp | 969  | 0.0561 | 0.0705 | 0.7961 |

|              |    |      |        |        |        |
|--------------|----|------|--------|--------|--------|
|              | Me | 966  | 0.0616 | 0.0658 | 0.9363 |
|              | Rc | 969  | 0.0728 | 0.0734 | 0.9928 |
| <b>ndhF</b>  | Bc | 2208 | 0.1208 | 0.8423 | 0.1434 |
|              | Br | 2136 | 0.1474 | 0.4361 | 0.3380 |
|              | Ci | 2091 | 0.1498 | 0.6895 | 0.2173 |
|              | Hr | 2073 | 0.1339 | 0.7426 | 0.1803 |
|              | Vs | 2181 | 0.1372 | 0.6870 | 0.1997 |
|              | Pa | 2133 | 0.1170 | 0.6696 | 0.1748 |
|              | Sp | 2205 | 0.1288 | 0.7228 | 0.1782 |
|              | Me | 2133 | 0.1136 | 0.6134 | 0.1852 |
|              | Rc | 2196 | 0.1251 | 0.6120 | 0.2044 |
| <b>rpl32</b> | Bc | 129  | 0.1032 | 0.4613 | 0.2237 |
|              | Br | 149  | 0.1208 | 0.5008 | 0.2412 |
|              | Ci | 159  | 0.0608 | 0.6309 | 0.0964 |
|              | Hr | 159  | 0.0976 | 0.5969 | 0.1635 |
|              | Vs | -    | -      | -      | -      |
|              | Pa | -    | -      | -      | -      |
|              | Sp | -    | -      | -      | -      |
|              | Me | 162  | 0.0829 | 0.5463 | 0.1518 |
|              | Rc | 165  | 0.1034 | 0.5701 | 0.1814 |
| <b>ccsA</b>  | Bc | 927  | 0.1356 | 0.4433 | 0.3060 |
|              | Br | 930  | 0.1346 | 0.4582 | 0.2938 |
|              | Ci | 915  | 0.1587 | 0.4180 | 0.3797 |
|              | Hr | 915  | 0.1635 | 0.4289 | 0.3811 |
|              | Vs | 933  | 0.1559 | 0.4829 | 0.3229 |
|              | Pa | 936  | 0.1546 | 0.4044 | 0.3823 |
|              | Sp | 837  | 0.2206 | 0.1571 | 1.4045 |
|              | Me | 927  | 0.1205 | 0.4037 | 0.2985 |
|              | Rc | 936  | 0.1231 | 0.4157 | 0.2961 |

|             |    |      |        |        |        |
|-------------|----|------|--------|--------|--------|
| <b>ndhD</b> | Bc | 1491 | 0.0538 | 0.4808 | 0.1120 |
|             | Br | 1476 | 0.0541 | 0.4735 | 0.1143 |
|             | Ci | 1500 | 0.0692 | 0.5569 | 0.1243 |
|             | Hr | 1500 | 0.0694 | 0.5457 | 0.1272 |
|             | Vs | 1350 | 0.0572 | 0.6148 | 0.0930 |
|             | Pa | 1497 | 0.0831 | 0.4729 | 0.1757 |
|             | Sp | 1497 | 0.0807 | 0.4983 | 0.1619 |
|             | Me | 1497 | 0.0711 | 0.4771 | 0.1491 |
|             | Rc | 1500 | 0.0734 | 0.4417 | 0.1663 |
| <b>psaC</b> | Bc | 243  | 0.0064 | 0.4508 | 0.0143 |
|             | Br | 243  | 0.0064 | 0.4508 | 0.0143 |
|             | Ci | 243  | 0.0080 | 0.5060 | 0.0158 |
|             | Hr | 243  | 0.0080 | 0.5307 | 0.0151 |
|             | Vs | 243  | 0.0080 | 0.4811 | 0.0166 |
|             | Pa | 243  | 0.0096 | 0.5746 | 0.0167 |
|             | Sp | 243  | 0.0096 | 0.6277 | 0.0153 |
|             | Me | 243  | 0.0080 | 0.5138 | 0.0156 |
|             | Rc | 243  | 0.0083 | 0.5655 | 0.0147 |
| <b>ndhE</b> | Bc | 303  | 0.0404 | 0.3657 | 0.1107 |
|             | Br | 303  | 0.0404 | 0.3657 | 0.1107 |
|             | Ci | 300  | 0.0474 | 0.4546 | 0.1042 |
|             | Hr | 300  | 0.0470 | 0.4063 | 0.1158 |
|             | Vs | 303  | 0.0773 | 0.5376 | 0.1438 |
|             | Pa | 303  | 0.0885 | 0.3396 | 0.2605 |
|             | Sp | 303  | 0.0702 | 0.3893 | 0.1804 |
|             | Me | 303  | 0.0645 | 0.3642 | 0.1770 |
|             | Rc | 303  | 0.0443 | 0.3812 | 0.1163 |
| <b>ndhG</b> | Bc | 528  | 0.0610 | 0.5273 | 0.1157 |
|             | Br | 528  | 0.0610 | 0.5273 | 0.1157 |

|             |    |      |        |        |        |
|-------------|----|------|--------|--------|--------|
|             | Ci | 528  | 0.0851 | 0.3536 | 0.2408 |
|             | Hr | 528  | 0.0796 | 0.3438 | 0.2315 |
|             | Vs | 528  | 0.0617 | 0.5021 | 0.1229 |
|             | Pa | 528  | 0.0743 | 0.3524 | 0.2108 |
|             | Sp | 528  | 0.0772 | 0.3105 | 0.2486 |
|             | Me | 528  | 0.0603 | 0.4055 | 0.1487 |
|             | Rc | 528  | 0.0722 | 0.4164 | 0.1734 |
| <b>ndhI</b> | Bc | 495  | 0.0572 | 0.2813 | 0.2034 |
|             | Br | 498  | 0.0477 | 0.2961 | 0.1613 |
|             | Ci | 483  | 0.0667 | 0.2627 | 0.2541 |
|             | Hr | 483  | 0.0733 | 0.2998 | 0.2443 |
|             | Vs | 489  | 0.0435 | 0.3384 | 0.1286 |
|             | Pa | 498  | 0.0579 | 0.2136 | 0.2709 |
|             | Sp | 498  | 0.0576 | 0.2123 | 0.2712 |
|             | Me | 492  | 1.3905 | 1.1603 | 0.8345 |
|             | Rc | 501  | 0.0619 | 0.3132 | 0.1975 |
| <b>ndhA</b> | Bc | 537  | 0.0331 | 0.4110 | 0.0805 |
|             | Br | 1089 | 0.0492 | 0.3585 | 0.1372 |
|             | Ci | 1074 | 0.0583 | 0.4781 | 0.1219 |
|             | Hr | 1077 | 0.0577 | 0.4788 | 0.1206 |
|             | Vs | 1089 | 0.0532 | 0.4081 | 0.1303 |
|             | Pa | 1086 | 0.0440 | 0.3377 | 0.1303 |
|             | Sp | 537  | 0.0444 | 0.3683 | 0.1205 |
|             | Me | 1089 | 0.0434 | 0.3034 | 0.1432 |
|             | Rc | 1086 | 0.0412 | 0.3443 | 0.1196 |
| <b>ndhH</b> | Bc | 1179 | 0.0421 | 0.5371 | 0.0784 |
|             | Br | 1179 | 0.0421 | 0.5371 | 0.0784 |
|             | Ci | 1179 | 0.0355 | 0.6644 | 0.0534 |
|             | Hr | 1179 | 0.0348 | 0.7576 | 0.0459 |

|              |    |      |        |        |        |
|--------------|----|------|--------|--------|--------|
|              | Vs | 1179 | 0.0421 | 0.6390 | 0.0659 |
|              | Pa | 1179 | 0.0397 | 0.5298 | 0.0749 |
|              | Sp | 1179 | 0.0417 | 0.5311 | 0.0784 |
|              | Me | 1179 | 0.0368 | 0.5447 | 0.0675 |
|              | Rc | 1170 | 0.0297 | 0.4765 | 0.0623 |
| <b>rps15</b> | Bc | 261  | 0.1319 | 0.6877 | 0.1919 |
|              | Br | 261  | 0.1370 | 0.7108 | 0.1928 |
|              | Ci | 261  | 0.1576 | 0.9524 | 0.1655 |
|              | Hr | 258  | 0.1544 | 0.8528 | 0.0001 |
|              | Vs | 258  | 0.2009 | 0.7836 | 0.0001 |
|              | Pa | 261  | 0.1494 | 0.8518 | 0.0001 |
|              | Sp | 258  | 0.1482 | 0.8000 | 0.1852 |
|              | Me | 261  | 0.1079 | 0.7280 | 0.1482 |
|              | Rc | 261  | 0.0985 | 0.5976 | 0.1648 |



**Table S3.** Number of simple sequence repeats (SSR) loci in the chloroplast genome of *Byrsonima coccolobifolia* and *B. crassifolia*

|                                 |                                     | Number of repeats |    |    |    |    |    |    |    |    |     |   |   |    |     | Total |
|---------------------------------|-------------------------------------|-------------------|----|----|----|----|----|----|----|----|-----|---|---|----|-----|-------|
| Motif                           |                                     | 16                | 15 | 14 | 13 | 12 | 11 | 10 | 9  | 8  | 7   | 6 | 5 | 4  | 3   |       |
| <i>Byrsonima coccolobifolia</i> | A/T                                 | 1                 | 2  | 6  | 3  | 12 | 20 | 34 | 44 | 57 | 117 | - | - | -  | -   | 296   |
|                                 | C/G                                 | -                 | -  | -  | -  | 1  | 3  | 2  | 1  | 4  | 12  | - | - | -  | -   | 23    |
|                                 | AG/AT                               | -                 | -  | -  | -  | -  | -  | -  | -  | -  | -   | 2 | 3 | 20 | -   | 25    |
|                                 | CA/CT                               | -                 | -  | -  | -  | -  | -  | -  | -  | -  | -   | - | - | 2  | -   | 2     |
|                                 | GA                                  | -                 | -  | -  | -  | -  | -  | -  | -  | -  | -   | - | - | 6  | -   | 6     |
|                                 | TA/TC                               | -                 | -  | -  | -  | -  | -  | -  | -  | -  | 1   | 1 | 2 | 7  | -   | 11    |
|                                 | AAC/AAG/AAT/ACG/AGA/AGC/AGT/ATA/ATT | -                 | -  | -  | -  | -  | -  | -  | -  | -  | -   | - | - | 3  | 18  | 21    |
|                                 | CAA/CAG/CTG/CTT                     | -                 | -  | -  | -  | -  | -  | -  | -  | -  | -   | - | - | -  | 6   | 6     |
|                                 | GAA/GAG/GAT/GCA/GCT/GGA/GGT         | -                 | -  | -  | -  | -  | -  | -  | -  | -  | -   | - | - | 1  | 8   | 9     |
|                                 | TAA/TAG/TAT/TCC/TCT/TGC/TTA/TTC/TTG | -                 | -  | -  | -  | -  | -  | -  | -  | -  | -   | - | - | -  | 22  | 22    |
|                                 | AAGA                                | -                 | -  | -  | -  | -  | -  | -  | -  | -  | -   | - | - | -  | 1   | 1     |
|                                 | GATT                                | -                 | -  | -  | -  | -  | -  | -  | -  | -  | -   | - | - | -  | 1   | 1     |
|                                 | TGAT                                | -                 | -  | -  | -  | -  | -  | -  | -  | -  | -   | - | - | -  | 1   | 1     |
|                                 | TTAA                                | -                 | -  | -  | -  | -  | -  | -  | -  | -  | -   | - | - | -  | 1   | 1     |
|                                 | ATATA                               | -                 | -  | -  | -  | -  | -  | -  | -  | -  | -   | - | - | -  | 1   | 1     |
|                                 | ATTAA                               | -                 | -  | -  | -  | -  | -  | -  | -  | -  | -   | - | - | -  | -   | 0     |
|                                 | TTATA                               | -                 | -  | -  | -  | -  | -  | -  | -  | -  | -   | - | - | -  | 1   | 1     |
| Total                           |                                     |                   |    |    |    |    |    |    |    |    |     |   |   |    | 427 |       |
| <i>Byrsonima crassifolia</i>    | A/T                                 | -                 | -  | 2  | 9  | 9  | 23 | 34 | 37 | 58 | 115 | - | - | -  | -   | 287   |
|                                 | C/G                                 | -                 | -  | -  | -  | 1  | 2  | 1  | 6  | 2  | 13  | - | - | -  | -   | 25    |
|                                 | AG/AT                               | -                 | -  | -  | -  | -  | -  | -  | -  | -  | -   | 2 | 4 | 20 | -   | 26    |
|                                 | CA/CT                               | -                 | -  | -  | -  | -  | -  | -  | -  | -  | -   | - | - | 2  | -   | 2     |
|                                 | GA                                  | -                 | -  | -  | -  | -  | -  | -  | -  | -  | -   | - | - | 6  | -   | 6     |
|                                 | TA/TC                               | -                 | -  | -  | -  | -  | -  | -  | -  | -  | 1   | 1 | 1 | 6  | -   | 9     |
|                                 | AAC/AAG/AAT/ACG/AGA/AGC/AGT/ATA/ATT | -                 | -  | -  | -  | -  | -  | -  | -  | -  | -   | - | - | 1  | 17  | 18    |
|                                 | CAA/CAG/CTG/CTT                     | -                 | -  | -  | -  | -  | -  | -  | -  | -  | -   | - | - | -  | 6   | 6     |
|                                 | GAA/GAG/GAT/GCA/GCT/GGA/GGT         | -                 | -  | -  | -  | -  | -  | -  | -  | -  | -   | - | - | 1  | 8   | 9     |
|                                 | TAA/TAG/TAT/TCC/TCT/TGC/TTA/TTC/TTG | -                 | -  | -  | -  | -  | -  | -  | -  | -  | -   | - | - | -  | 20  | 20    |
|                                 | AAGA                                | -                 | -  | -  | -  | -  | -  | -  | -  | -  | -   | - | - | -  | 1   | 1     |
|                                 | GATT                                | -                 | -  | -  | -  | -  | -  | -  | -  | -  | -   | - | - | -  | 1   | 1     |
|                                 | TGAT                                | -                 | -  | -  | -  | -  | -  | -  | -  | -  | -   | - | - | -  | 1   | 1     |
|                                 | TTAA                                | -                 | -  | -  | -  | -  | -  | -  | -  | -  | -   | - | - | -  | 1   | 1     |
|                                 | ATATA                               | -                 | -  | -  | -  | -  | -  | -  | -  | -  | -   | - | - | -  | -   | 0     |
| ATTAA                           | -                                   | -                 | -  | -  | -  | -  | -  | -  | -  | -  | -   | - | - | 1  | 1   |       |
| TTATA                           | -                                   | -                 | -  | -  | -  | -  | -  | -  | -  | -  | -   | - | - | 1  | 1   |       |
| Total                           |                                     |                   |    |    |    |    |    |    |    |    |     |   |   |    | 414 |       |

**Table S4.** Species used in the study and their respective botanic families and accession numbers

| Family           | Species                                 | Abbreviation | Accession number |
|------------------|-----------------------------------------|--------------|------------------|
| Euphorbiaceae    | <i>Manihot esculenta</i> Crantz         | Me           | NC_010433        |
|                  | <i>Ricinus communis</i> L.              | Rc           | NC_016736        |
| Chrysobalanaceae | <i>Chrysobalanus icaco</i> L.           | Ci           | NC_024061        |
|                  | <i>Hirtella racemosa</i> Lam.           | Hr           | NC_024060        |
| Malpighiaceae    | <i>Byrsonima coccolobifolia</i> Kunth   | Bc           | -                |
|                  | <i>Byrsonima crassifolia</i> (L.) Kunth | Br           | -                |
| Salicaceae       | <i>Populus alba</i> L.                  | Pa           | NC_008235        |
|                  | <i>Salix purpurea</i> L.                | Sp           | NC_026722        |
| Violaceae        | <i>Viola seoulensis</i> Nakai           | Vs           | NC_026986        |
